# Cooperation increases robustness to ecological disturbance in microbial cross-feeding networks

Leonardo Oña <sup>\*1</sup> and Christian Kost <sup>†1</sup>

<sup>1</sup>Department of Ecology, School of Biology/Chemistry, Osnabrück University, Osnabrück, Germany.

May 15, 2020

## Abstract

Microorganisms mainly exist within complex networks of ecological interactions. Given that the growth and survival of community members frequently depend on an obligate exchange of essential metabolites, it is generally unclear how such communities can persist despite the destabilizing force of ecological disturbance. Here we address this issue using a population dynamics model. In contrast to previous work that suggests the potential for obligate interaction networks to evolve is limited, we find the opposite pattern: natural selection in the form of ecological disturbance favors both specific network topologies and cooperative cross-feeding among community members. These results establish environmental selection as a key driver shaping the architecture of microbial interaction networks.

---

\*E-mail: leonardoxona@gmail.com; phone: +49 541 969 2255

†E-mail: christiankost@gmail.com

## 16 **1 Significance**

17 Microbes live in diverse communities that significantly impact the ecology and evolution of other  
18 organisms. These communities represent complex ecological networks, within which the con-  
19 stituent strains engage in an obligate exchange of essential metabolites. However, it remains gener-  
20 ally unclear how these interactions can persist in the face of strong ecological perturbation. Here,  
21 we address this question using a population dynamics model. We show that both the topology of  
22 the interaction network and the degree to which microbes engage in a cooperative exchange of  
23 metabolites shape the systems robustness to ecological disturbance. Thus, our study identifies key  
24 principles underlying metabolic trade in natural microbial communities. These results can help to  
25 design synthetic microbial consortia for medical and biotechnological applications.

## 26 **2 Introduction**

27 Microbial communities play key roles in many ecosystems<sup>1,2</sup> and contribute significantly to the  
28 maintenance of plant and animal health<sup>3,4,5</sup>. In most cases, these assemblages consist of a large  
29 number of metabolically diverse genotypes that engage in a complex network of both antagonis-  
30 tic and synergistic ecological interactions<sup>6,7</sup>. While it is clear that the interplay between these  
31 different interactions determines the structure, function, and evolution of a given microbial com-  
32 munity, the general principles guiding this process remain poorly understood. However, a detailed  
33 knowledge of how properties of individual strains combine to give rise to emergent phenotypes at  
34 the community-level is not only central to our understanding of microbial ecology, but also to the  
35 design of synthetic microbial communities for medical or biotechnological applications<sup>8,6</sup>.

36 One specific type of ecological interaction that appears to be particularly important in micro-  
37 bial communities is the exchange of essential metabolites among community members<sup>9,10,11</sup>. A  
38 growing body of literature suggests that a large proportion of all bacteria known lacks biosynthetic  
39 pathways to autonomously produce essential building block metabolites such as amino acids, vi-  
40 tamins, and even nucleotides<sup>12,13,14</sup>. Thus, growth and survival of these so-called *auxotrophic*  
41 microorganisms depends on the presence of other individuals that provide sufficient amounts of the  
42 required metabolites. The evolutionary process that likely drives the emergence of such metabolic  
43 dependencies has been termed *Black Queen* dynamics<sup>15,16</sup>. The basic idea is that as microbes  
44 grow, they commonly release significant amounts of metabolites in the extracellular environment.  
45 These compounds represent a valuable resource (i.e., a so-called *public good*) that can be used by  
46 newly arising auxotrophic genotypes that lack the ability to autonomously produce the correspond-  
47 ing metabolites. In this way, an obligate metabolic interaction is generated that ties the fate of the  
48 auxotrophic recipient to the presence of other cells that can provide it with the required metabolite.

49 Interestingly, it has been shown that auxotrophic mutants gain a significant fitness advantage from  
50 using external metabolite sources, because they save the energy to produce the compound on their  
51 own<sup>14,16</sup>. This type metabolic cross-feeding interaction, which initially relies on an exchange of  
52 metabolic by-products, can be further strengthened when auxotrophic genotypes start to increase  
53 the production level of the traded chemical<sup>17,18,19</sup>. Such an increased investment that is costly to  
54 the producing cell, can be favored by natural selection, when the cooperative cell is rewarded for its  
55 initiative by receiving fitness benefits in return. This can be the case when two types interact that  
56 reciprocally exchange essential metabolites<sup>17,19</sup> or if the interaction is staged in a spatially struc-  
57 tured environment with low rates of population intermixing<sup>20,21</sup>. In the long-run, this evolutionary  
58 process is expected to give rise to multipartite microbial networks of different sizes and topologies,  
59 within which metabolites are reciprocally exchanged<sup>10</sup>.

60 In the beginning, such interaction networks are likely created by chance: resident auxotrophic  
61 mutants and prototrophic genotypes that share the same environment start engaging in metabolic  
62 cross-feeding interactions. Depending on the amounts of metabolites the interacting cells produce  
63 and consume, the resulting interaction collapses immediately or remains stable for extended pe-  
64 riods. However, what determines the stability of these highly-interwoven interaction networks?  
65 Given that the survival of auxotrophic cells critically depends on the presence of other individu-  
66 als that can provide the required metabolite, loss of these donor cells may lead to a catastrophic  
67 collapse of the entire microbial community. Indeed, a previous theoretical study on the ecological  
68 stability of microbial community networks concluded that cooperating networks of microbes are  
69 often unstable<sup>22</sup>. In this study, stability was modeled as resilience: the capacity to return to the  
70 equilibrium after a transient change in population size. However, changes in the environment often  
71 cause modifications of population growth rates, instead of merely a transient decrease in the num-  
72 ber of individuals. Moreover, given that the public goods that are exchanged between microbial  
73 strains are often key for determining community stability, their dynamics should be taken into ac-  
74 count as well<sup>23</sup>. Furthermore, even though public goods can negatively affect yield and stability of  
75 microbial communities when they are produced in sub-optimal concentrations, they can also pos-  
76 itively affect these parameters when they are efficiently produced and involved in an effect called  
77 ‘division of labor’. Here, two or more strains can save energy by distributing the production of  
78 certain metabolites among the participating individuals and subsequently exchanging the produced  
79 compounds<sup>18,24</sup>. However, this division of labor effect was not considered in previous models<sup>22</sup>.  
80 Taken together, environmental variables can directly and indirectly affect population growth rates  
81 by modifying the production and availability of public goods. In this way, environmental changes  
82 can impinge upon the dynamics and stability of microbial communities.

83 Changes in environmental variables are more explicitly incorporated in models as ecological  
84 disturbance by modifying one or several parameters that affect the growth rate of the focal popu-

85 lation. Disturbance, in the form of periodically-occurring or constant perturbations of the environ-  
86 ment, can cause mass-mortality and has been shown to strongly affect the composition, structure,  
87 and function of microbial communities from diverse habitats such as soil<sup>25</sup>, lakes<sup>26</sup>, and the human  
88 gut<sup>27,28</sup>. Models incorporating disturbance in microbial communities revealed that the response to  
89 such perturbations can exhibit complex dynamics<sup>29</sup>. Following disturbance, the community can,  
90 for example, undergo critical transitions to alternative stable states<sup>30,29</sup> or approach a catastrophic  
91 collapse of the entire community<sup>31,32</sup>. The architecture of the network that is determined by the  
92 ecological interactions among individual types can strongly affect the robustness of biological com-  
93 munities to such events of ecological disturbance<sup>33</sup>. This is the case, for example, for pollination,  
94 seed dispersal<sup>34</sup>, and trophic networks<sup>35</sup>. However, very little is known on how ecological net-  
95 works of different sizes and topologies within microbial communities respond to disturbance<sup>13</sup>.

96 Here we fill this gap by using a population dynamics model to analyze networks of auxotrophic  
97 microorganisms that exchange metabolites as extracellular public goods. In particular, we aim at  
98 identifying how the robustness of these networks to ecological disturbance is affected by: (i) the  
99 number of auxotrophy-causing mutations, (ii) the topology of the interaction network, and (iii) the  
100 presence of cooperative cross-feeders within the network. Our analysis revealed that, all else being  
101 equal, communities with more auxotrophy-causing mutations were less robust to disturbance. Sec-  
102 ond, the network topology of metabolite production strongly affected the system's stability. Finally,  
103 mutations that increased amino acid production levels of auxotrophic microbes within interaction  
104 networks increased the robustness of these communities to ecological disturbance.

### 105 3 Methods

106 The dynamics of  $n$  auxotrophic microbes ( $B_i$ ) and  $m$  metabolites ( $M_k$ ) is described by the following  
107 system of ordinary differential equations:

$$\frac{dB_i}{dt} = B_i \left( \Gamma(M_k) - \kappa_i B_i - \sum_{\substack{i=1 \\ i \neq i}}^n \phi_i B_i - D \right) \quad (1)$$

$$\frac{dM_k}{dt} = \sum_{i=1}^n \psi_{i,k} \Omega_i B_i - M_k \left( q_k + \sum_{i=1}^n d_i B_i - \alpha D \right) \quad (2)$$

108 The function  $\Gamma(M_k)$  takes different forms depending on the model assumptions (see Supplementary  
109 Material for details and extensions). In the model used throughout the main text, this function is  
110 given by  $\Gamma(M_k) = \prod_{k=1}^m M_k (r_k - \psi_{i,k} c_k)$ , where the per capita growth of microbes is the result

111 of the utilization of all metabolites with  $r_k$  denoting the per capita growth rate and  $c_k$  is the cost  
112 associated with the production for the  $k^{th}$  metabolite. The obligate nature of the interaction between  
113 microbes and metabolites is represented by the term  $\prod_{k=1}^m M_k (r_k - \psi_{i,k} c_k)$ . This product ensures  
114 that, when at least one of the metabolites  $M_k$  is zero, all microbes are going extinct. The terms  
115  $\kappa_i$  and  $\phi_i$  are the rate of intra- and inter-specific competition. Microbes produce metabolites at  
116 a rate  $\Omega_i$  and the intake of metabolites occurs at a rate  $d_i$ . Metabolites are also assumed to be  
117 lost by degradation or diffusion into the environment at a rate  $q_k$ . The parameter  $\psi_{i,k}$  represent  
118 the presence/absence of a mutation causing auxotrophy, and therefore can take the values 0 or 1,  
119 defining the network of auxotrophs. In the main model, we assumed that metabolites themselves  
120 are not affected by disturbance ( $\alpha = 0$ ). However, relaxing this assumption did not change the  
121 results (see the Supplementary Material).

### 122 **3.1 Disturbance in random networks of auxotrophs**

123 Simulations are based on different parametrization of the model given by equations (1, 2), describ-  
124 ing the microbial dynamics and the metabolites produced. We created microbial systems assuming  
125 that all parameters affecting the dynamics are the same among microbes, and the same among  
126 metabolites (in the main text) and vary only the position of mutation-causing auxotrophies in the  
127 network. This allowed us to study the stability of the resulting network topology of metabolite  
128 production in isolation, without the confounding effect that would result if parameters were differ-  
129 ent among microbes and metabolites. To ensure that our results still hold when this assumption is  
130 relaxed, we assigned random parameters for microbes and metabolites in another set of simulations  
131 (see Supplementary Material).

132 In all cases, network topologies are given by a bipartite graph describing metabolite produc-  
133 tion by microbes (Fig.1a). Here, a network is formalized by a matrix in which entries contain the  
134 production of the  $k^{th}$  metabolite by the  $i^{th}$  microbe. A microbial system of prototrophs producing  
135 metabolites is given by a matrix of size  $n \times m$ , where all  $\psi_{i,k} = 1$ . In such a microbial system,  
136 a mutation causing auxotrophy is symbolized by a particular entry in the matrix where  $\psi_{i,k} = 0$ .  
137 For a given fixed number of auxotrophy-causing mutations, different matrices are randomly gen-  
138 erated, characterized by a fixed number of zeros in the entries, but in different positions in the  
139 matrix. This diversity of patterns in the randomly generated matrices, under the formalization of  
140 the network theory, was characterized by different topologies. Not all topologies resulting from the  
141 randomization process generate microbial systems with a stable equilibrium, where all microbes  
142 and all metabolites are non-zero. Thus, we only incorporated cases, where the resulting system of  
143 equations has a stable equilibrium with non-zero microbes and metabolites, and such equilibrium  
144 is stable (i.e., all eigenvalues were negative). For this, we first assumed that  $D = 0$ , then obtained

145 the equilibrium where all variables were non-zero, and finally used those values as the initial con-  
146 dition for a new set of ordinary differential equations, where the disturbance term was added to the  
147 equation for the microbes ( $D > 0$ ). This type of disturbance has been called ‘press disturbance’<sup>36</sup>  
148 (see Supplementary Material for details). Each microbial system generated through the random-  
149 ization process was exposed to increased levels of disturbance (i.e., increasing the numerical value  
150 of parameter  $D$ ) (Fig.1b) until it went extinct. The disturbance value  $D$ , where the first extinction  
151 took place, was defined as the robustness for that microbial system.

### 152 3.2 Normalized entropy and assortativity

153 Each randomly generated microbial system is represented by an interaction network between mi-  
154 crobes and metabolites with a certain topology, which can be depicted as a bipartite network  
155 (Fig.1a). Analyzing these networks, we aimed at finding topological properties that correlate with  
156 robust responses to disturbance. Two measures, which describe the degree of homogeneity with  
157 which metabolite production is distributed among microbes, were strongly correlated with network  
158 robustness. The first one defines how evenly auxotrophy-causing mutation are distributed in the  
159 microbial community. The corresponding value is simply given by the entropy of the distribution  
160 of mutations causing auxotrophy, relative to the maximum entropy possible for that particular num-  
161 ber of mutations, and it is called the ‘normalized entropy’ (*node degree in microbes*, given by the  
162 red bar plot in Fig.1a). On the other hand, metabolites can be produced by a different number of  
163 microbes (*node degree of metabolites*, given by the blue bar plot in Fig.1a. This measure describes  
164 how evenly the production of each metabolite is distributed within the community). The second  
165 measure, the ‘assortativity index’, quantifies the correlation between the node degree of microbes  
166 with the node degree of metabolites.

167 The total number of vertices  $v_j$  for  $n$  microbes  $B_i$ , and  $m$  metabolites  $M_k$ , is  $l = n + m$  (with  $j =$   
168  $i + k$ ). The normalized entropy is calculated using the standard Shannon index<sup>37</sup>. The normalized  
169 entropy is given by:  $E_R = (-\sum_{i=1} v_i \log v_i) / E_M$ , with  $E_M = -\sum_i (i / \sum_i v_i) \log(i / \sum_i v_i)$ . Note that  
170 in this case, the index  $i$  refers to the number of vertices representing the microbial populations (not  
171 the metabolites). If there are  $\mu$  auxotrophy-causing mutations in the community, then there will be  
172  $s = n \times m - \mu$  links in the network.

173 Mathematically, the assortativity is given by a correlation coefficient<sup>38</sup> defined by:

$$\rho = \frac{1}{\sigma_P^2} \sum_{j,k} jk (E_{jk} - P_j P_k) \quad (3)$$

174 which runs from  $-1$  for completely disassortative behavior to  $1$  for completely assortative.

175 Here,  $P_k$  is the normalized distribution of the remaining degree - the number of edges leaving the  
176 node, other than the one that connects the pair -,  $\sigma_P^2$  is its variance, and  $E_{jk}$  is the joint probability  
177 distribution of the remaining degrees of the two vertices at either end of a link. Note that the  
178 network describing auxotrophies links microbes with metabolites and is bipartite, i.e., there are  
179 links connecting only microbes to metabolites and *vice versa*, but not microbes to microbes or  
180 metabolites to metabolites. Therefore, the relevant description of the interaction is given by a  
181 *biadjacency matrix*  $\psi_{i,k}$ .

### 182 **3.3 Cooperative cross-feeding networks**

183 Loss-of-function mutations can cause auxotrophies and thus affect the production of shared metabo-  
184 lites. In addition, other mutations can result in an increased production of shared metabolites within  
185 a microbial community. This can occur, for example, by mutations that redirect fluxes within  
186 metabolic networks or deregulate biosynthetic pathways<sup>39,18</sup>. As a consequence, the microbial  
187 community is comprised of a mixture of auxotrophs and cooperative cross-feeders for different  
188 metabolites. We define a parameter  $\xi$ , denoting the degree of cooperative cross-feeding in the  
189 community. This parameter can take values in the range 0 and 1, with 1 indicating that all (100%)  
190 metabolites in the given community are produced in increased amounts.

## 191 **4 Results**

### 192 **4.1 Model of cross-feeding networks**

193 Our main goal is to understand how environmental disturbance affects different networks of mi-  
194 croorganisms that exchange essential metabolites with each other. Specifically, we aim at identify-  
195 ing the parameters that confer robustness against this disturbance. To achieve this goal, we devised  
196 a population dynamics model, which describes both the dynamics of all microbial strains that are  
197 part of the interaction network and the metabolites that are exchanged between them. The resulting  
198 interaction networks can be depicted as a bipartite graph including both the interacting microbes  
199 as well as the exchanged metabolites (Fig.1a). Strains within this network can either be able to  
200 produce all metabolites they require for growth (i.e., prototrophic genotypes) or lack the ability  
201 to produce one or more metabolites (i.e., auxotrophic genotypes). By distributing a certain num-  
202 ber of auxotrophy-causing mutations among microbial strains, interaction networks were randomly  
203 generated that differed in their size (i.e., number of interacting genotypes) and topology (i.e., distri-  
204 bution of metabolic fluxes among cells). In addition, the amount of metabolites a given microbial  
205 genotype produces can be increased to assess how the presence of cooperative phenotypes affects

206 the robustness of the network interaction to ecological disturbance. The resulting microbial net-  
207 works were exposed to increased levels of disturbance until the population went extinct (Fig.1b,c).  
208 The lowest disturbance value, at which a population collapsed, was used to define the robustness of  
209 the focal microbial system.

## 210 **4.2 Increasing numbers of metabolic auxotrophies decreases network ro-** 211 **bustness to ecological disturbance**

212 To verify how different degrees of metabolic auxotrophies affect the ecological stability of a net-  
213 work of cross-feeding microbes, we randomly introduced auxotrophy-causing mutations at the  
214 community level and evaluated the robustness of the resulting microbial system to ecological dis-  
215 turbance.

216 Our analysis revealed that communities with a higher number of auxotrophy-causing mutations  
217 were - on average - less robust to ecological disturbance than communities with a lower num-  
218 ber of auxotrophies (Fig.2). The relationship between robustness and the number of auxotrophy-  
219 causing mutations in the community can be described with an exponential decay model. Such a  
220 model describes the average robustness for each number of auxotrophy-causing mutations (Fig.2).  
221 One source of variance at this level is caused by the fact that not all topologies resulting from  
222 the randomization process gave rise to microbial systems with a stable equilibrium (i.e., where  
223 all microbes and all metabolites are present). Moreover, the variance increased for larger micro-  
224 bial systems (compare Fig.2 a with Fig.2 b), because the number of combinations, in which the  
225 auxotrophy-causing mutations can be distributed within the networks (i.e., the number of network  
226 topologies), is larger.

227 Together, these results show that auxotrophy-causing mutations can be detrimental for microbial  
228 communities, by making them more vulnerable to ecological disturbances.

## 229 **4.3 The topology of auxotrophic networks affects their robustness to ecolog-** 230 **ical disturbance**

231 In our model, we generated different auxotrophic networks by randomly introducing loss-of-function  
232 mutations into a given microbial system, which affected the ability of the corresponding microor-  
233 ganisms to produce certain metabolites. As a consequence of this procedure, a given microorgan-  
234 ism can carry more than one auxotrophy-causing mutation, thus being unable to produce several  
235 metabolites simultaneously. Above, we studied the effect of auxotrophy-causing mutations on  
236 the robustness of the entire microbial community to ecological disturbance. However, for a fixed  
237 number of auxotrophy-causing mutations, several patterns can emerge, depending on how these



238 mutations are distributed among microbes. The range of patterns that can result when mutations  
239 are differentially assigned to microorganisms includes cases with a homogeneous distribution of  
240 auxotrophy-causing mutations as well as heterogeneous distributions, where some auxotrophs bear  
241 the majority of mutations, while all other cells only carry a few.

242 Our analysis identified two measures, which capture essential properties of the focal topology  
243 and correlate with the network robustness to ecological disturbance: (1) *normalized entropy* and  
244 (2) *assortativity* (see the “Methods” section for more details) (Fig.3). Simulations show that both  
245 normalized entropy and assortativity were positively correlated with robustness to ecological dis-  
246 turbance (Fig.3 c, d). This means that microbial networks, in which metabolite production is more  
247 homogeneously distributed, are more robust to ecological disturbance. This is due to the effect the  
248 network topology has on the distribution of the microbial population sizes at equilibrium. Asym-  
249 metries in the number of metabolites produced by auxotrophs generate an increase in the variance  
250 of the distribution of the microbial population sizes at equilibrium, with some populations being  
251 present at a lower population frequency, thus making them more prone to extinction. The extinction  
252 of one microbe can then trigger a cascade of extinctions of other members in the consortium.

253 Thus, our results show that the way auxotrophy-causing mutations are distributed among mem-  
254 bers of a cross-feeding community (i.e., its topology) strongly affects the robustness of the corre-  
255 sponding communities to ecological disturbances.

#### 256 **4.4 Metabolite overproduction increases network robustness to ecological** 257 **disturbance**

258 So far, we have assumed that mutations in microorganisms only affect their ability to produce  
259 certain metabolites. However, mutations may also increase the amount of metabolites a given cell  
260 produces<sup>18</sup>. If the resulting metabolite overproduction is costly to the producing cell and the result-  
261 ing mutant is stabilized by natural selection, the mutation would have transformed the interaction,  
262 which was previously based on an exchange of metabolic by-products, into a truly cooperative  
263 interaction. However, it is not clear how the presence of such cooperative cross-feeding mutants  
264 within a network of auxotrophic cells affects the robustness of the network to ecological distur-  
265 bance. To test this, we created networks with a different number of auxotrophy-causing mutations  
266 and then allowed some fraction of cells to increase the production levels of the remaining metabolic  
267 capabilities by a certain magnitude. In all cases, microbes carrying a mutation causing metabolite  
268 overproduction payed a fitness cost, which reflected the increased metabolic and energetic invest-  
269 ment.

270 Our results show that the combination of both types of mutations (i.e., auxotrophy-causing and  
271 overproduction-causing mutations) can generate networks with a variable response to ecological

272 disturbance. Specifically, the presence of mutations causing metabolite overproduction in an aux-  
273 trophic network can increase the robustness of the entire community to ecological disturbance  
274 (Fig.4). Networks that were more robust to ecological disturbance emerged when the auxotrophy-  
275 causing mutations generate topologies where metabolite production is homogeneous, while the  
276 relative position of the mutations causing metabolite overproduction can result in an increase in  
277 the abundance of metabolites that are produced by a low number of microbes. Strikingly, some  
278 particular combinations of mutations were more robust to ecological disturbance than an entirely  
279 prototrophic network (Fig.4 b).

280 Together, these results show that cooperative cross-feeding networks containing both auxotrophy-  
281 causing and overproduction mutations can be highly robust to ecological disturbance, which may  
282 even exceed the stability of prototrophic communities.

## 283 **5 Discussion**

284 In this study, we examined the effect of ecological disturbance on the stability of microbial com-  
285 munities using a dynamical model that describes the interaction between auxotrophic microorgan-  
286 isms and the public goods they produce. This interaction was formalized as a network, which  
287 was quantitatively analyzed using different measures of network topology. Our results revealed  
288 that (1) communities with more auxotrophy-causing mutations were less robust to disturbance, (2)  
289 microbial networks, where the production of public goods was more homogeneously distributed  
290 among community members, were more robust to ecological disturbance than networks with a  
291 more heterogeneous distribution, and (3) mutations that increased metabolite production levels of  
292 auxotrophic microbes within interaction networks increased the robustness of these communities  
293 to ecological disturbance.

294 In the core mathematical model, we assumed that i) disturbance remains constant during the  
295 simulation (i.e., press disturbance), ii) auxotrophic microorganisms essentially depend upon an  
296 external supply of the required metabolite(-s) to grow (i.e., if one of the essential metabolites cannot  
297 be produced anymore by at least one other strain, the whole community collapses), and finally,  
298 iii) the metabolites are not affected by the disturbance itself (e.g., metabolites do not degrade).  
299 However, relaxing these assumptions does not affect any of our main conclusions

300 First, if the disturbance stops before the community collapses (i.e., pulse disturbance), the mi-  
301 crobial community could still be able to recover and return to the equilibrium. Thus, as a rule  
302 of thumb, pulse disturbance is expected to be less disruptive than press disturbance for a given  
303 fixed magnitude of disturbance. Moreover, if a set of networks is ordered from more robust to  
304 less robust when press disturbance is modeled, the same order is expected to be maintained when  
305 pulse disturbance is modeled instead. As a consequence, and given that we are interested in the

306 robustness of a group of networks defined as the magnitude of disturbance leading to the collapse  
307 of the whole community, we focused our attention on the case of press disturbance. A more com-  
308 plex, non-trivial behavior is expected to emerge if the microbial system is exposed to sequential  
309 pulses of disturbance. However, this issue should be addressed in future studies. Additionally, it  
310 is important to mention that a common approach used to determine the stability of a system in-  
311 volves studying departures from the system's equilibrium when the initial conditions are changed.  
312 In our case, this is represented by the initial number of metabolites and the population sizes of  
313 the microbial populations in the community. In this way, the stability of microbial communities  
314 is modeled as resilience (i.e., the capacity to return to the equilibrium after a transient change in  
315 the population size). This approach implicitly assumes that changes in the environment (e.g., pH,  
316 temperature, concentration of antibiotics or toxins in the medium) will eventually result in a de-  
317 cline of the population size. In such a framework, cooperation destabilizes microbial networks<sup>22</sup>.  
318 However, environmental perturbations of this type are more accurately described by modifying the  
319 rate at which microbes replicate (i.e., their Darwinian fitness). Also, the empirical observation of  
320 an efficient division of labor between microbes for metabolite production<sup>18,24</sup> has been ignored in  
321 models studying the stability of cooperating microbial networks<sup>22</sup>. By explicitly incorporating per-  
322 turbations affecting the rate at which microbes replicate in combination with an efficient division of  
323 labor for metabolite production into our model, we showed - in stark contrast to a previous study<sup>22</sup>  
324 - a positive effect of metabolic cooperation on the stability of microbial interaction networks. This  
325 result emerges, because an enhanced production of the metabolites, which are exchanged among  
326 microorganisms, results in a stronger growth response that ultimately increases the robustness of a  
327 given community to environmental disturbance.

328 Second, metabolic interactions among different microbial cells can be obligate or facultative  
329 for growth and reproduction of the metabolite-receiving cell. As previously mentioned, we as-  
330 summed interactions to be obligate, which would for example be the case of auxotrophic bacteria  
331 that lack the ability to autonomously produce certain amino acids. However, public goods might  
332 not be essential, but can still significantly contribute to microbial fitness. This would be the case for  
333 metabolites such as amino acids, vitamins, or nucleotides that are opportunistically consumed as  
334 nutrients, whenever they become available in the environment. Also, enzymes that break down ex-  
335 tracellular proteins (i.e., proteases<sup>40</sup>) or sugars (e.g., invertases,<sup>41</sup>) liberate publicly available com-  
336 pounds that can enhance the fitness of other community members. Other public goods that could  
337 be involved in facultative interaction networks are secondary metabolites that are produced to repel  
338 competitors<sup>42</sup>, deter predators<sup>43</sup>, or kill and degrade prey organisms<sup>44</sup>. Relaxing the assumption  
339 of an obligate interaction by using an additive Monod growth model did not affect any of our main  
340 conclusions (see Supplementary Material). Given that our results can be applied to different types  
341 of interaction networks (e.g., obligate or facultative), our results are relevant to a diverse range of

342 microbial systems. These include ecological communities such as intestinal microbiota<sup>45,46</sup>, soil  
343 microbiota<sup>47,48</sup>, or microbiota living in aquatic environments<sup>49</sup>.

344 Third, research shows that modeling mutualistic interactions, without explicitly accounting for  
345 the dynamics of resources that mediate interactions between species, can significantly alter conclu-  
346 sions regarding the long-term stability of microbial communities<sup>23</sup>. Given that in our model, we  
347 explicitly describe the dynamics of metabolite production and consumption, conclusions regarding  
348 the stability will not be altered by these model simplifications present in other studies. In the core  
349 model, we have assumed that disturbance only affects the microbial community, yet not the traded  
350 metabolites. This would be the case, for example, when the disturbance is due to the presence of  
351 an antibiotic in the environment. However, disturbances such as changes in the pH or temperature  
352 might affect both the microbial community and the corresponding metabolites themselves (e.g.,  
353 by changing their chemical properties that affects the chemical's bioavailability or by chemically  
354 degrading the nutrient). Nevertheless, a relaxation of this assumption also yields results that are  
355 consistent with the main findings of our study (see Supplementary Material).

356 The space of potential network configurations is expected to be strongly affected by how acces-  
357 sible the shared metabolites are to other community members. Different factors will have an im-  
358 pact on this, such as a limited diffusion in spatially structured environments<sup>21</sup>, contact-dependent  
359 transfer of metabolites via specialized structures<sup>50,51,52</sup>, or a decreased metabolite production by  
360 changes in the intracellular metabolic network architecture<sup>53</sup>. Future work should evaluate the role  
361 of spatial structure and specialized transport mechanisms for determining the stability of intercel-  
362 lular metabolic networks. Also, the incorporation of metabolic parameters that can be obtained,  
363 for example through flux balance analysis<sup>54</sup>, could reveal interesting insights into the dynamics of  
364 metabolite exchange within a given microbial community facing disturbance.

365 Both theory and experiments suggest that microbial population dynamics and the evolutionary  
366 dynamics of genes, which are associated with cooperative phenotypes such as the production of  
367 public goods, operate on similar timescales and can be linked to each other via an eco-evolutionary  
368 feedback loop<sup>55</sup>. As a consequence, a microbial network of auxotrophic mutants may respond to  
369 an ecological disturbance by adapting evolutionarily to the corresponding selection pressure. One  
370 possible response could be to increase the amount of metabolites that are being overproduced. In-  
371 deed, it has been shown previously that metabolite production can change as a phenotypic response  
372 to environmental stress<sup>56</sup>. If a microorganism within a given network increased the production  
373 of a certain metabolite as a response to the disturbance, this would imply a change in one link of  
374 the network. The resulting new network would be more or less robust to the environmental dis-  
375 turbances. In our model, we did not consider a dynamic change in the network as a response to  
376 environmental disturbance and instead assumed fixed levels of metabolite production. However,  
377 we explored a statistically meaningful and representative subset of the relevant categories, includ-

378 ing networks with different degrees of auxotrophy (Fig.2 and Fig.3), different levels of metabolite  
379 overproduction, and their combinations (Fig.4). Future work should address how eco-evolutionary  
380 feedback loops within microbial auxotrophic networks respond to ecological disturbance.

381 Here, we have analyzed the ecological stability of intercellular metabolic networks consisting  
382 of auxotrophic and cooperative cross-feeding microorganisms. We have identified the amount of  
383 public goods that is produced by a given microbial community as well as the way these metabolites  
384 are exchanged among community members (i.e., the network topology) as key parameters deter-  
385 mining the stability of the whole system. However, the production of metabolites that are being  
386 exchanged may not be independent of each other, but can potentially be interconnected through the  
387 underlying biosynthetic pathways. Thus, epistatic interactions among mutations causing auxotro-  
388 phy<sup>57</sup> and/ or metabolite overproduction may strongly affect how natural selection operates on a  
389 given microbial network. Future work should dissect how the topology of intracellular metabolic  
390 networks affects the topology of networks that can emerge between cells. Our approach is general,  
391 and can therefore be interpreted as a null model for microbial community interactions via public  
392 goods in the absence of these constraints. Previous studies analyzed the emergence of coopera-  
393 tive phenotype mainly through the lens of social evolution. By examining the ecological dynamics  
394 of different cross-feeding networks, we discovered that increased production levels of exchanged  
395 metabolites can significantly enhance the stability of the whole microbial community. Our findings  
396 thus provide an intuitive explanation for the evolution and maintenance of metabolic cooperation,  
397 suggesting that these cooperative genotypes may be more widespread than previously thought.

398 **Authors contributions.** CK and LO conceived the initial research direction; LO refined con-  
399 cepts, conceived the approach, created and analyzed all models; LO wrote the initial version of the  
400 manuscript, which was amended by CK.

#### 401 **ACKNOWLEDGMENTS.**

402 The authors would like to thanks the University of Osnabrück for funding and the Kostlab for  
403 fruitful discussions and helpful comments.

## References

- 404 1. Delgado-Baquerizo, M., Maestre, F. T., Reich, P. B., Jeffries, T. C., Gaitan, J. J., Encinar, D.,  
405 Berdugo, M., Campbell, C. D., and Singh, B. K. Microbial diversity drives multifunctionality  
406 in terrestrial ecosystems. *Nature communications*, 7:10541, (2016).
- 408 2. Azam, F. and Malfatti, F. Microbial structuring of marine ecosystems. *Nature Reviews Micro-*  
409 *biology*, 5(10):782–791, (2007).
- 410 3. Lee, W.-J. and Hase, K. Gut microbiota-generated metabolites in animal health and disease.  
411 *Nature chemical biology*, 10(6):416–424, (2014).
- 412 4. Friesen, M. L., Porter, S. S., Stark, S. C., Von Wettberg, E. J., Sachs, J. L., and Martinez-  
413 Romero, E. Microbially mediated plant functional traits. *Annual review of ecology, evolution,*  
414 *and systematics*, 42:23–46, (2011).
- 415 5. Mueller, U. G. and Sachs, J. L. Engineering microbiomes to improve plant and animal health.  
416 *Trends in microbiology*, 23(10):606–617, (2015).
- 417 6. Faust, K. and Raes, J. Microbial interactions: from networks to models. *Nature Reviews*  
418 *Microbiology*, 10(8):538–550, (2012).
- 419 7. Corel, E., Lopez, P., Méheust, R., and Bapteste, E. Network-thinking: graphs to analyze  
420 microbial complexity and evolution. *Trends in Microbiology*, 24(3):224–237, (2016).
- 421 8. Dunham, M. J. Synthetic ecology: a model system for cooperation. *Proceedings of the Na-*  
422 *tional Academy of Sciences*, 104(6):1741–1742, (2007).
- 423 9. Seth, E. C. and Taga, M. E. Nutrient cross-feeding in the microbial world. *Front Microbiol*, 5:  
424 350, (2014).
- 425 10. Pande, S. and Kost, C. Bacterial Unculturability and the Formation of Intercellular Metabolic  
426 Networks. *Trends Microbiol.*, 25(5):349–361, (2017).
- 427 11. D’Souza, G., Shitut, S., Preussger, D., Yousif, G., Waschina, S., and Kost, C. Ecology and  
428 evolution of metabolic cross-feeding interactions in bacteria. *Natural Product Reports*, 35(5):  
429 455–488, (2018).
- 430 12. Touchon, M., Hoede, C., Tenailon, O., Barbe, V., Baeriswyl, S., Bidet, P., Bingen, E., Bona-  
431 corsi, S., Bouchier, C., Bouvet, O., et al. Organised genome dynamics in the escherichia coli  
432 species results in highly diverse adaptive paths. *PLoS genetics*, 5(1):e1000344, (2009).

- 433 13. Mee, M. T., Collins, J. J., Church, G. M., and Wang, H. H. Syntrophic exchange in synthetic  
434 microbial communities. *Proc. Natl. Acad. Sci. U.S.A.*, 111(20):E2149–2156, (2014).
- 435 14. D’Souza, G., Waschina, S., Pande, S., Bohl, K., Kaleta, C., and Kost, C. Less is more: selective  
436 advantages can explain the prevalent loss of biosynthetic genes in bacteria. *Evolution*, 68(9):  
437 2559–2570, (2014).
- 438 15. Morris, J. J., Lenski, R. E., and Zinser, E. R. The Black Queen Hypothesis: evolution of  
439 dependencies through adaptive gene loss. *MBio*, 3(2), (2012).
- 440 16. D’Souza, G. and Kost, C. Experimental Evolution of Metabolic Dependency in Bacteria. *PLoS*  
441 *Genet.*, 12(11):e1006364, (2016).
- 442 17. Harcombe, W. Novel cooperation experimentally evolved between species. *Evolution*, 64(7):  
443 2166–2172, (2010).
- 444 18. Pande, S., Merker, H., Bohl, K., Reichelt, M., Schuster, S., de Figueiredo, L. F., Kaleta, C.,  
445 and Kost, C. Fitness and stability of obligate cross-feeding interactions that emerge upon gene  
446 loss in bacteria. *ISME J*, 8(5):953–962, (2014).
- 447 19. Harcombe, W. R., Chacón, J. M., Adamowicz, E. M., Chubiz, L. M., and Marx, C. J. Evolution  
448 of bidirectional costly mutualism from byproduct consumption. *Proceedings of the National*  
449 *Academy of Sciences*, 115(47):12000–12004, (2018).
- 450 20. Drescher, K., Nadell, C. D., Stone, H. A., Wingreen, N. S., and Bassler, B. L. Solutions to the  
451 public goods dilemma in bacterial biofilms. *Curr. Biol.*, 24(1):50–55, (2014).
- 452 21. Pande, S., Kaftan, F., Lang, S., Svato, A., Germerodt, S., and Kost, C. Privatization of coop-  
453 erative benefits stabilizes mutualistic cross-feeding interactions in spatially structured environ-  
454 ments. *ISME J*, 10(6):1413–1423, (2016).
- 455 22. Coyte, K. Z., Schluter, J., and Foster, K. R. The ecology of the microbiome: Networks,  
456 competition, and stability. *Science*, 350(6261):663–666, (2015).
- 457 23. Butler, S. and O’Dwyer, J. P. Stability criteria for complex microbial communities. *Nat Com-*  
458 *mun*, 9(1):2970, (2018).
- 459 24. Giri, S., Waschina, S., Kaleta, C., and Kost, C. Defining division of labour in microbial com-  
460 munities. *Journal of molecular biology*, (2019).
- 461 25. Holden, S. R. and Treseder, K. K. A meta-analysis of soil microbial biomass responses to  
462 forest disturbances. *Front Microbiol*, 4:163, (2013).

- 463 26. Shade, A., Read, J. S., Youngblut, N. D., Fierer, N., Knight, R., Kratz, T. K., Lottig, N. R.,  
464 Roden, E. E., Stanley, E. H., Stombaugh, J., Whitaker, R. J., Wu, C. H., and McMahon, K. D.  
465 Lake microbial communities are resilient after a whole-ecosystem disturbance. *ISME J*, 6(12):  
466 2153–2167, (2012).
- 467 27. Moya, A. and Ferrer, M. Functional Redundancy-Induced Stability of Gut Microbiota Sub-  
468 jected to Disturbance. *Trends Microbiol.*, 24(5):402–413, (2016).
- 469 28. Lozupone, C. A., Stombaugh, J. I., Gordon, J. I., Jansson, J. K., and Knight, R. Diversity,  
470 stability and resilience of the human gut microbiota. *Nature*, 489(7415):220–230, (2012).
- 471 29. Dai, L., Korolev, K. S., and Gore, J. Relation between stability and resilience determines the  
472 performance of early warning signals under different environmental drivers. *Proc. Natl. Acad.*  
473 *Sci. U.S.A.*, 112(32):10056–10061, (2015).
- 474 30. Kitano, H. Biological robustness. *Nat. Rev. Genet.*, 5(11):826–837, (2004).
- 475 31. Sanchez, A. and Gore, J. feedback between population and evolutionary dynamics determines  
476 the fate of social microbial populations. *PLoS Biol.*, 11(4):e1001547, (2013).
- 477 32. Rauch, J., Kondev, J., and Sanchez, A. Cooperators trade off ecological resilience and evolu-  
478 tionary stability in public goods games. *J R Soc Interface*, 14(127), (2017).
- 479 33. May, R. M. Will a large complex system be stable? *Nature*, 18(238(5364)):413–414, (1972).
- 480 34. Fortuna, M. A. and Bascompte, J. Habitat loss and the structure of plant-animal mutualistic  
481 networks. *Ecol. Lett.*, 9(3):281–286, (2006).
- 482 35. Bascompte, J., Melian, C. J., and Sala, E. Interaction strength combinations and the overfishing  
483 of a marine food web. *Proc. Natl. Acad. Sci. U.S.A.*, 102(15):5443–5447, (2005).
- 484 36. Shade, A., Peter, H., Allison, S. D., Baho, D. L., Berga, M., Burgmann, H., Huber, D. H., Lan-  
485 genheder, S., Lennon, J. T., Martiny, J. B., Matulich, K. L., Schmidt, T. M., and Handelsman,  
486 J. Fundamentals of microbial community resistance and resilience. *Front Microbiol*, 3:417,  
487 (2012).
- 488 37. Shannon, C. A mathematical theory of communication. *Bell System Technical Journal*, 27:  
489 379–423, 623–656, (1948).
- 490 38. Newman, M. E. Assortative mixing in networks. *Phys. Rev. Lett.*, 89(20):208701, (2002).



- 491 39. Bohl, K., Figueiredo, L. F. d., Hädicke, O., Klamt, S., Kost, C., Schuster, S., and Kaleta, C.  
492 Casop gs: Computing intervention strategies targeted at production improvement in genome-  
493 scale metabolic networks. In *German Conference on Bioinformatics 2010*. Gesellschaft für  
494 Informatik eV, (2010).
- 495 40. Hase, C. C. and Finkelstein, R. A. Bacterial extracellular zinc-containing metalloproteases.  
496 *Microbiol. Rev.*, 57(4):823–837, (1993).
- 497 41. Greig, D. and Travisano, M. The Prisoner’s Dilemma and polymorphism in yeast SUC genes.  
498 *Proc. Biol. Sci.*, 271 Suppl 3:S25–26, (2004).
- 499 42. Burgess, J. G., Boyd, K. G., Armstrong, E., Jiang, Z., Yan, L., Berggren, M., May, U., Pisacane,  
500 T., Granmo, A., and Adams, D. R. The development of a marine natural product-based antifoul-  
501 ing paint. *Biofouling*, 19 Suppl:197–205, (2003).
- 502 43. Velicer, G. J. and Mendes-Soares, H. Bacterial predators. *Current Biology*, 19(2):R55–R56,  
503 (2009).
- 504 44. Xiao, Y., Wei, X., Ebright, R., and Wall, D. Antibiotic production by myxobacteria plays a  
505 role in predation. *Journal of bacteriology*, 193(18):4626–4633, (2011).
- 506 45. Stein, R. R., Bucci, V., Toussaint, N. C., Buffie, C. G., Räscht, G., Pamer, E. G., Sander, C.,  
507 and Xavier, J. B. Ecological modeling from time-series inference: insight into dynamics and  
508 stability of intestinal microbiota. *PLoS computational biology*, 9(12):e1003388, (2013).
- 509 46. Rakoff-Nahoum, S., Foster, K. R., and Comstock, L. E. The evolution of cooperation within  
510 the gut microbiota. *Nature*, 533(7602):255, (2016).
- 511 47. Jiang, X., Zerfaß, C., Feng, S., Eichmann, R., Asally, M., Schäfer, P., and Soyer, O. S. Impact  
512 of spatial organization on a novel auxotrophic interaction among soil microbes. *The ISME*  
513 *journal*, page 1, (2018).
- 514 48. Delgado-Baquerizo, M., Oliverio, A. M., Brewer, T. E., Benavent-González, A., Eldridge,  
515 D. J., Bardgett, R. D., Maestre, F. T., Singh, B. K., and Fierer, N. A global atlas of the  
516 dominant bacteria found in soil. *Science*, 359(6373):320–325, (2018).
- 517 49. Garcia, S. L., Buck, M., McMahon, K. D., Grossart, H.-P., Eiler, A., and Warnecke, F. Auxotro-  
518 phy and intrapopulation complementary in the ‘interactome’ of a cultivated freshwater model  
519 community. *Molecular ecology*, 24(17):4449–4459, (2015).

- 520 50. Benomar, S., Ranava, D., Cardenas, M. L., Trably, E., Rafrafi, Y., Ducret, A., Hamelin, J.,  
521 Lojou, E., Steyer, J. P., and Giudici-Ortoni, M. T. Nutritional stress induces exchange of cell  
522 material and energetic coupling between bacterial species. *Nat Commun*, 6:6283, (2015).
- 523 51. Pande, S., Shitut, S., Freund, L., Westermann, M., Bertels, F., Colesie, C., Bischofs, I. B., and  
524 Kost, C. Metabolic cross-feeding via intercellular nanotubes among bacteria. *Nat Commun*, 6:  
525 6238, (2015).
- 526 52. Dubey, G. P. and Ben-Yehuda, S. Intercellular nanotubes mediate bacterial communication.  
527 *Cell*, 144(4):590–600, (2011).
- 528 53. Waschina, S., D’Souza, G., Kost, C., and Kaleta, C. Metabolic network architecture and carbon  
529 source determine metabolite production costs. *FEBS J.*, 283(11):2149–2163, (2016).
- 530 54. Zomorodi, A. R. and Segre, D. Genome-driven evolutionary game theory helps understand  
531 the rise of metabolic interdependencies in microbial communities. *Nat Commun*, 8(1):1563,  
532 (2017).
- 533 55. Harrington, K. I. and Sanchez, A. Eco-evolutionary dynamics of complex social strategies in  
534 microbial communities. *Commun Integr Biol*, 7(1):e28230, (2014).
- 535 56. Hottes, A. K., Freddolino, P. L., Khare, A., Donnell, Z. N., Liu, J. C., and Tavazoie, S. Bacterial  
536 adaptation through loss of function. *PLoS Genet.*, 9(7):e1003617, (2013).
- 537 57. D’Souza, G., Waschina, S., Kaleta, C., and Kost, C. Plasticity and epistasis strongly affect  
538 bacterial fitness after losing multiple metabolic genes. *Evolution*, 69(5):1244–1254, (2015).

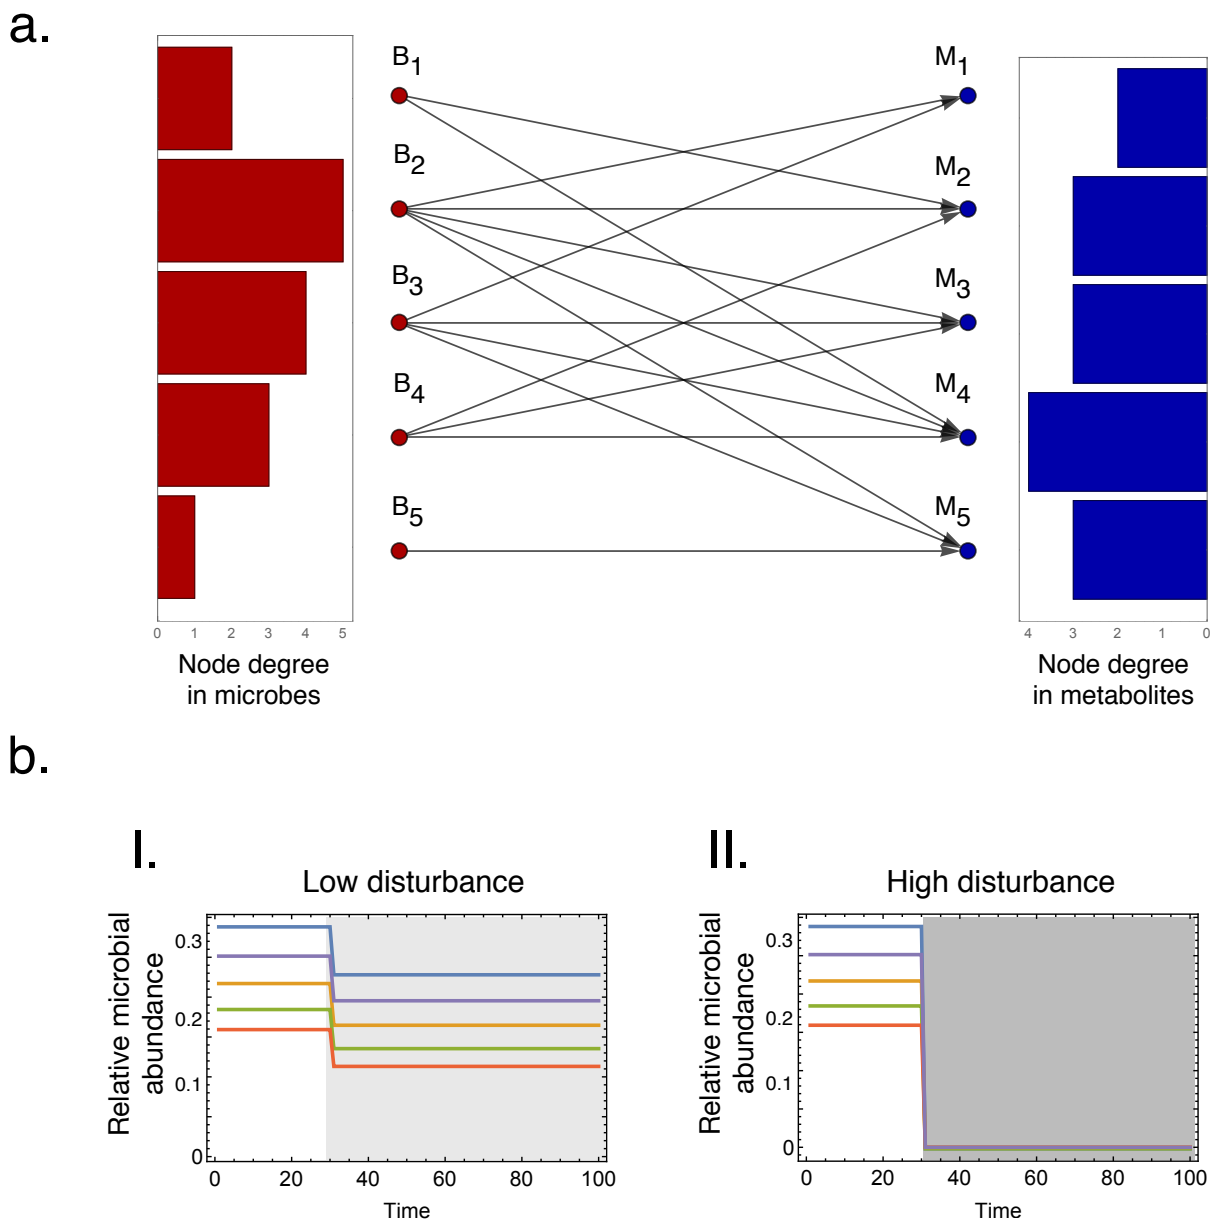

**Fig. 1. Networks of auxotrophic microorganisms and the effect of environmental disturbance.** (a) Exemplary network depicting microorganisms  $B_1 - B_5$  that produce metabolites  $M_1 - M_5$ . We define the *auxotrophy degree in microbes*, as the number of metabolites a microbe is unable to produce (i.e., the inverse of the node degree). In the example,  $B_1$  has an auxotrophy degree of 3, while  $B_5$  has an auxotrophy degree of 4. In a similar way, we define the *auxotrophy degree in metabolites*, as the number of microbes that are unable to produce a certain metabolite. In the example,  $M_1$  has a degree of 3, while  $M_4$  has a degree of 1. These quantities, which are shown as a bar plot, are important to characterize the topology of the network calculating the *normalized entropy* (i.e., using the distribution of the auxotrophy degree in microbes) or the *assortativity* of the network (i.e., using the distribution of the auxotrophy degree in both microbes and metabolites) (see main text for an explanation of these terms). (b) Effect of ecological disturbance on the dynamics of the ecological community shown in Fig. 1a. The network was disturbed with (I.) a low ( $D = 70$ ) or (II.) a high ( $D = 136$ ) intensity (i.e., shadowed areas).

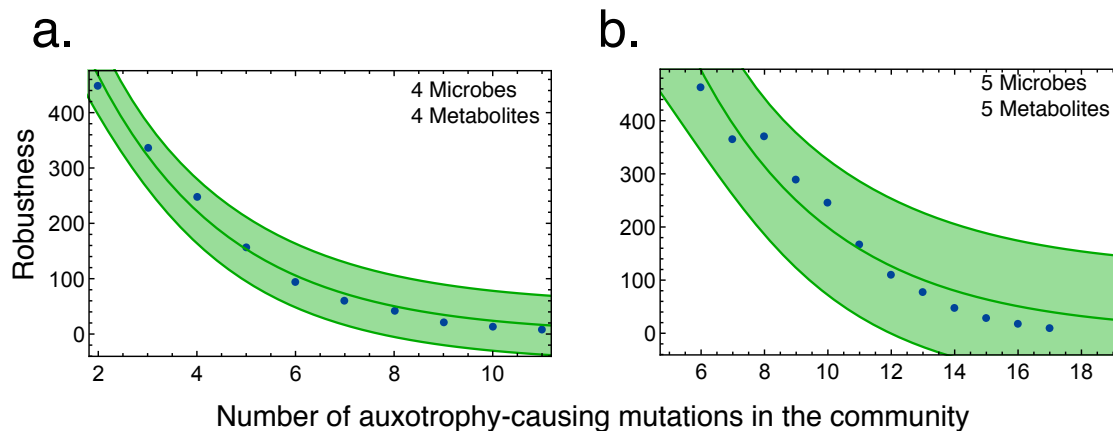

**Fig. 2. Increasing numbers of auxotrophy-causing mutations impair the robustness of microbial interaction networks to environmental disturbance.** The average robustness of interaction networks consisting of (a) four microorganisms producing four metabolites, or (b) five microorganisms producing five metabolites is shown. Blue points indicate the average robustness for each number of auxotrophy-causing mutations. An exponential decay model is fitted to the data (green line). The 95% confidence interval is shown with a green area.

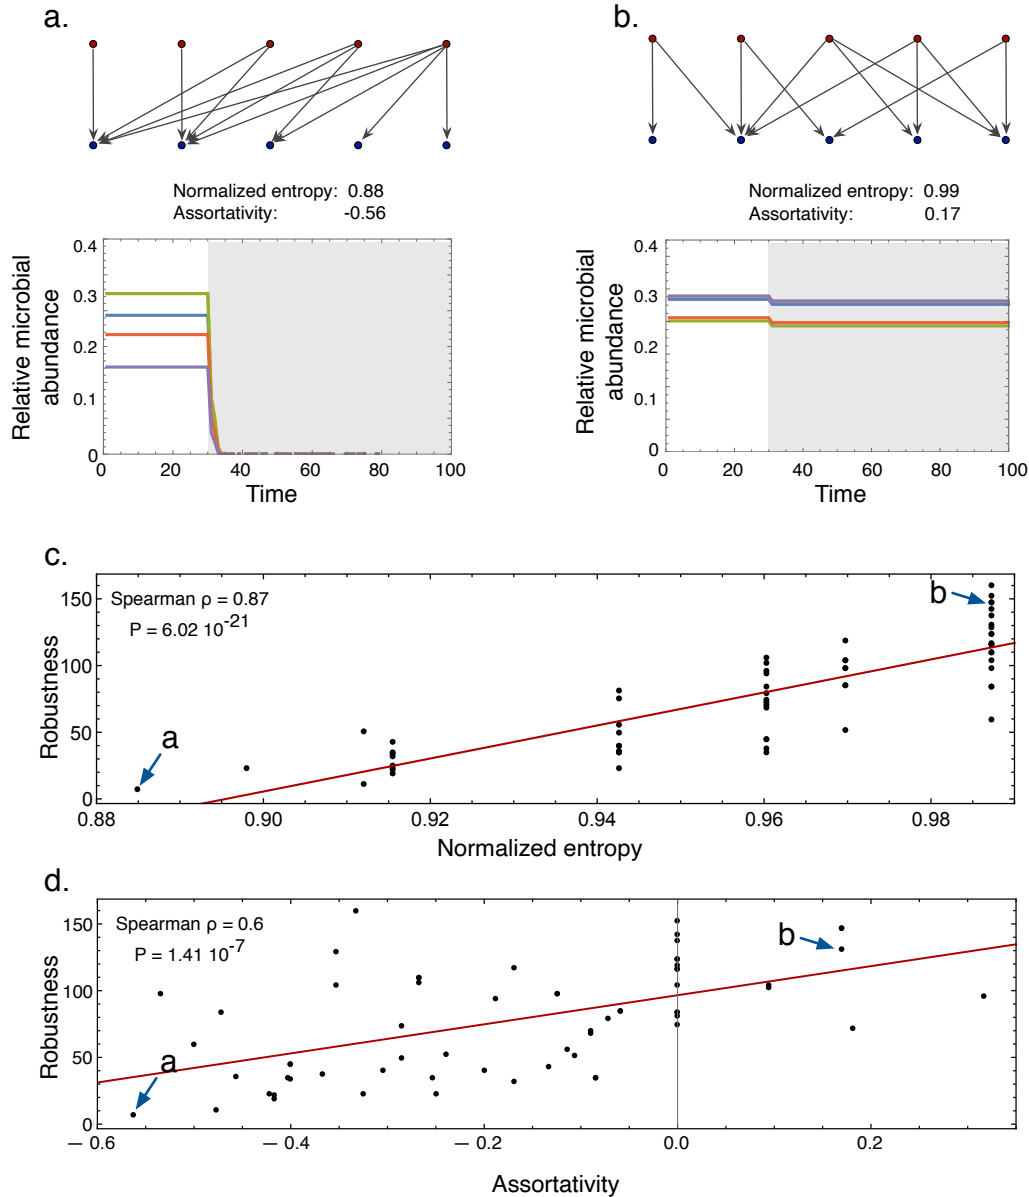

**Fig. 3. The topology of an interaction network determines its robustness to ecological disturbance. (a, b)** Two networks consisting of 5 microorganisms with the same number of auxotrophy-causing mutations (here: 12) that exchange 5 different metabolites, yet differ in their network topology, are differentially robust to the same degree of ecological disturbance ( $D = 7$ ). **(a)** The community goes extinct. **(b)** The population is maintained at an alternative stable state. **(c, d)** Statistical relationship between network robustness and **(c)** normalized entropy or **(d)** assortativity. Data represents a microbial system of 5 microbes with 12 auxotrophy-causing mutations in the community that exchange 5 metabolites in total. Arrows point to the networks shown in Fig.3 **(a, b)**.

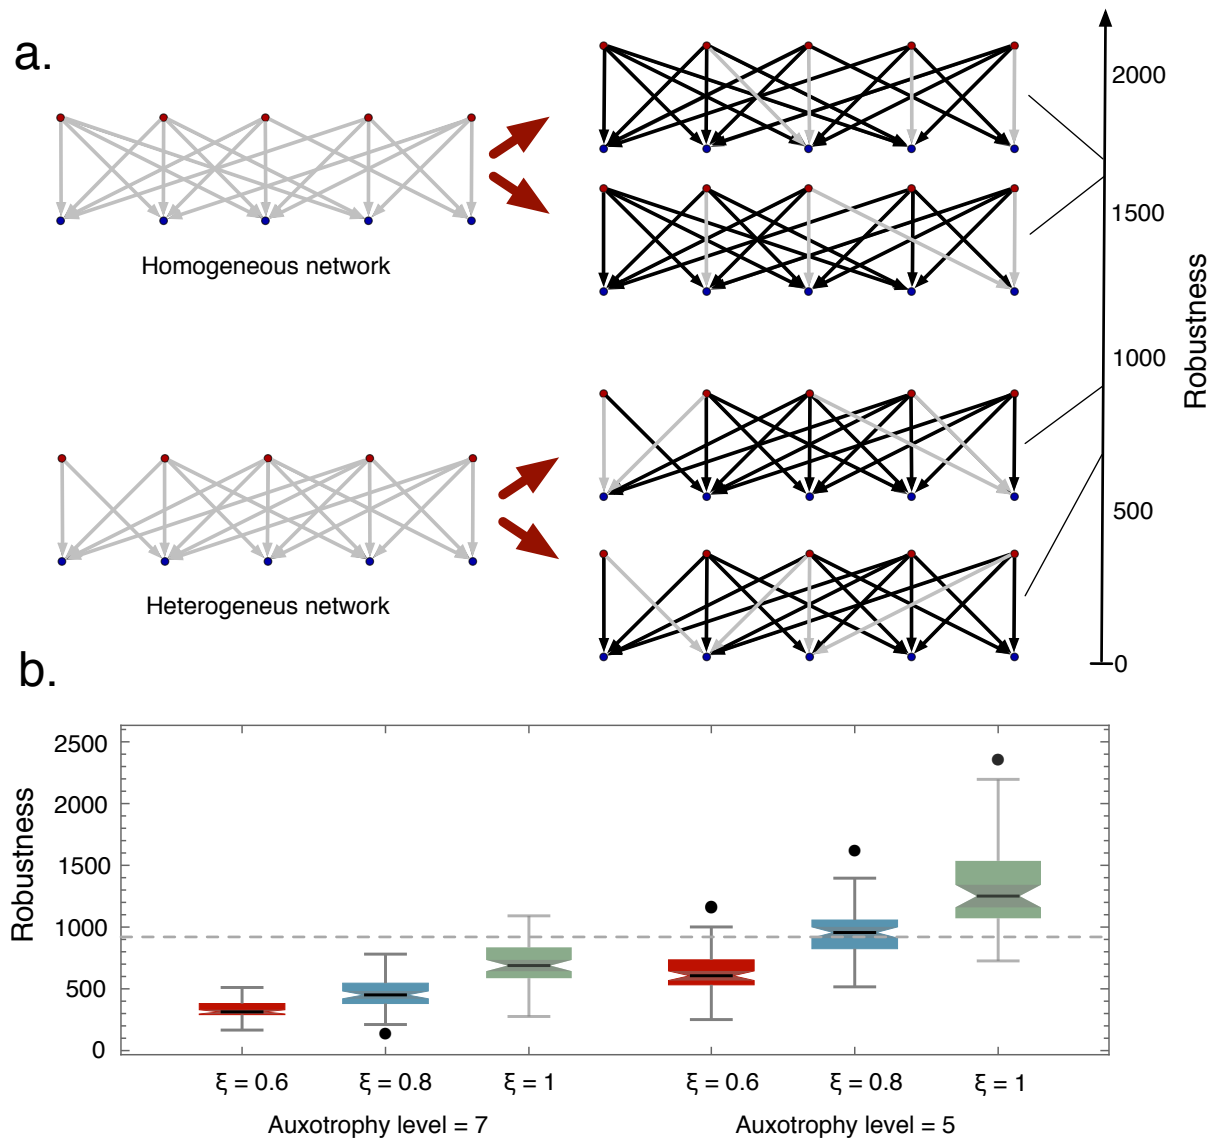

**Fig. 4. Increased production levels of the public good enhance the stability of interaction networks to environmental disturbance.** (a) Homogenous and heterogeneous networks can differ in their robustness, depending on which metabolites are produced in increased amounts. In this example, all networks include 5 auxotrophy-causing mutations and 16 links that are being overexpressed (i.e., the degree of cooperative cross-feeding in the community  $\xi = 0.8$ , black arrows in the network). Increasing the number of links that represent metabolites and which are produced in large amounts, enhances the robustness of the corresponding ecological networks to environmental disturbance. (b) Summary of networks with different topologies and different positions of overexpressed links. The dashed line is the robustness level of a prototrophic community (i.e., which does not contain any auxotrophic mutants).
